# Supplementary material for: Absorption Study of Mozuku Fucoidan in Japanese Volunteers
Source: MDPI journal article supplement (doi:10.3390/md16080254), 2018-07-30
Supplement: s1 [file s1]

## Dose dependent study for fucoidan absorption

### 【Purpose】

This test is conducted to confirm whether the concentration of fucoidan excreted in the urine increases depending on the dose of fucoidan administrated.

### 【Method】

- Materials
  - Fucoidan drink (one bottle contains 0.5 g fucoidan)
- Assay
  - Sandwich ELISA for fucoidan assay

Subjects took fucoidan drink (fucoidan concentration 1, 2, 3 g). The subjects ingested 1 g of fucoidan at first time. Subjects were allowed to rest for one day, and 2 g of fucoidan was taken at the second time. Subsequently, subjects rested for one day and 3 g of fucoidan was taken for the third time. Urine samples were collected at four times, before, 3, 6, and 9 hours after fucoidan administration. Urinary fucoidan concentration was measured using an ELISA method we developed.

### 【Results and discussion】

Since the average value of urinary fucoidan concentrations of each intake increased in a dose-dependent manner, it was suggested that fucoidan intake up to 3 g did not reach the plateau (Fig 1).

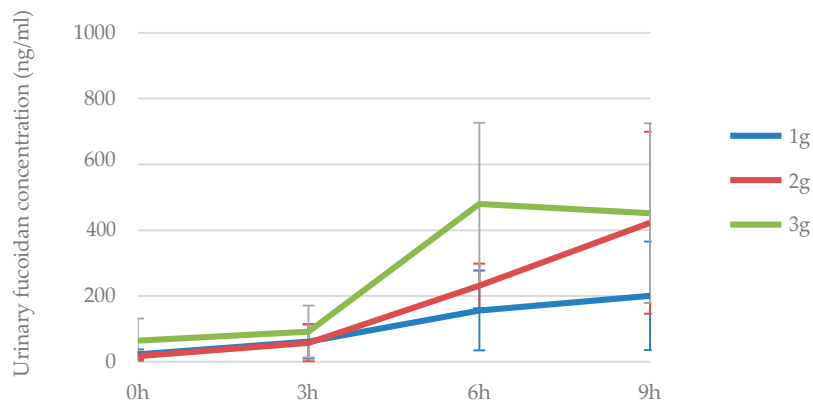

Figure S1. Urinary fucoidan concentration
